# Supplementary material for: Genetic and Epigenetic Traits as Biomarkers in Colorectal Cancer
Source: MDPI journal article supplement (doi:10.3390/ijms12129426), 2011-12-16
Supplement: s1 [file s1]

## Supplementary Information

**Table 1S. Details of commercially available tests.**

| <b>Test name</b> | <b>Biological material</b>           | <b>Biomarker(s)</b>                                                                                                                         |
|------------------|--------------------------------------|---------------------------------------------------------------------------------------------------------------------------------------------|
| ColoSure™        | Methylated DNA in feces              | <i>Vimentin</i>                                                                                                                             |
| ColoVantage®     | Methylated DNA in plasma             | <i>SEPT9</i>                                                                                                                                |
| ColoPrint®       | mRNA expression in tumor tissue      | <i>MCTP1, LAMA3, CTSC, PYROX D1, EDEM1, IL2RB, ZNF697, SLC6A11, IL2RA, CYFIP2, PIM3, LIF, PLIN3, HSD3B1, ZBED4, PPARA, THNSL2, CA438802</i> |
| OncoType DX®     | mRNA expression in tumor tissue      | <i>Ki-67, C-MYC, MYBL2, FAP, BGN, INHBA, GADD45B, ATP5E, PGK1, GPX1, UBB, VDAC2</i>                                                         |
| Previstage™      | mRNA expression in lymph node tissue | <i>GCC (GUCY2C)</i>                                                                                                                         |

© 2011 by the authors; licensee MDPI, Basel, Switzerland. This article is an open access article distributed under the terms and conditions of the Creative Commons Attribution license (<http://creativecommons.org/licenses/by/3.0/>).
